# Supplementary material for: Identification of QTLs for Resistance to Fusarium Head Blight Using a Doubled Haploid Population Derived from Southeastern United States Soft Red Winter Wheat Varieties AGS 2060 and AGS 2035
Source: PubMed Central journal article supplement (PMC7349885; doi:10.3390/genes11060699), 2020-06-25

## Supplementary Files

Table S1. Pearson correlation coefficients between FHB rating and days to heading in AGS2060 x AGS2035 DH population from data collected in Baton Rouge 2017.

|           | Days to Heading    | Incidence         | Severity          | Index             | FHB 0-9           | FDK               |
|-----------|--------------------|-------------------|-------------------|-------------------|-------------------|-------------------|
| Incidence | 0.197<br>(<.0001)  |                   |                   |                   |                   |                   |
| Severity  | 0.028<br>(0.567)   | 0.286<br>(<.0001) |                   |                   |                   |                   |
| Index     | 0.089<br>(0.078)   | 0.557<br>(<.0001) | 0.941<br>(<.0001) |                   |                   |                   |
| FHB 0-9   | 0.236<br>(<.0001)  | 0.802<br>(<.0001) | 0.602<br>(<.0001) | 0.756<br>(<.0001) |                   |                   |
| FDK       | -0.238<br>(<.0001) | 0.099<br>(0.049)  | 0.336<br>(<.0001) | 0.324<br>(<.0001) | 0.252<br>(<.0001) |                   |
| DON       | -0.170<br>(0.001)  | 0.135<br>(0.008)  | 0.369<br>(<.0001) | 0.345<br>(<.0001) | 0.237<br>(<.0001) | 0.592<br>(<.0001) |

Values in parenthesis indicate significance of correlation coefficients.

Table S2. Pearson correlation coefficients between FHB rating and days to heading in AGS2060 x AGS2035 DH population from data collected in Baton Rouge 2018.

|           | Days to heading   | Incidence         | Severity          | Index             | FHB 0-9           | FDK               |
|-----------|-------------------|-------------------|-------------------|-------------------|-------------------|-------------------|
| Incidence | -0.018<br>(0.722) |                   |                   |                   |                   |                   |
| Severity  | 0.282<br>(<.0001) | 0.488<br>(<.0001) |                   |                   |                   |                   |
| Index     | 0.182<br>(0.0003) | 0.709<br>(<.0001) | 0.949<br>(<.0001) |                   |                   |                   |
| FHB 0-9   | 0.218<br>(<.0001) | 0.848<br>(<.0001) | 0.723<br>(<.0001) | 0.827<br>(<.0001) |                   |                   |
| FDK       | -0.107<br>(0.033) | 0.548<br>(<.0001) | 0.465<br>(<.0001) | 0.563<br>(<.0001) | 0.530<br>(<.0001) |                   |
| DON       | -0.014<br>(0.780) | 0.429<br>(<.0001) | 0.519<br>(<.0001) | 0.570<br>(<.0001) | 0.464<br>(<.0001) | 0.643<br>(<.0001) |

Values in parenthesis indicate significance of correlation coefficients.

Table S3. Pearson correlation coefficients between FHB rating and relative maturity in AGS 2060 x AGS 2035 DH population from data collected in Winnsboro 2018.

|           | Rel Mat            | Incidence         | Severity          | Index             | FHB 0-9           | FDK               |
|-----------|--------------------|-------------------|-------------------|-------------------|-------------------|-------------------|
| Incidence | -0.132<br>(-0.063) |                   |                   |                   |                   |                   |
| Severity  | 0.234<br>(-0.001)  | 0.511<br>(<.0001) |                   |                   |                   |                   |
| Index     | 0.084<br>(-0.239)  | 0.8<br>(<.0001)   | 0.913<br>(<.0001) |                   |                   |                   |
| FHB 0-9   | -0.056<br>(-0.432) | 0.928<br>(<.0001) | 0.632<br>(<.0001) | 0.838<br>(<.0001) |                   |                   |
| FDK       | 0.078<br>(-0.269)  | 0.581<br>(<.0001) | 0.513<br>(<.0001) | 0.622<br>(<.0001) | 0.626<br>(<.0001) |                   |
| DON       | 0.372<br>(<.0001)  | 0.426<br>(<.0001) | 0.503<br>(<.0001) | 0.537<br>(<.0001) | 0.518<br>(<.0001) | 0.733<br>(<.0001) |

Values in parenthesis indicate significance of correlation coefficients.

Table S4. Pearson correlation coefficients between FHB rating and relative maturity in AGS 2060 x AGS 2035 DH population from data collected in Winnsboro 2019.

|           | Rel Mat           | Incidence         | Severity          | Index             | FHB 0-9           | FDK                 |
|-----------|-------------------|-------------------|-------------------|-------------------|-------------------|---------------------|
| Incidence | 0.185<br>-0.0003  |                   |                   |                   |                   |                     |
| Severity  | 0.249<br>(<.0001) | 0.532<br>(<.0001) |                   |                   |                   |                     |
| Index     | 0.249<br>(<.0001) | 0.795<br>(<.0001) | 0.923<br>(<.0001) |                   |                   |                     |
| FHB 0-9   | 0.235<br>(<.0001) | 0.876<br>(<.0001) | 0.659<br>(<.0001) | 0.802<br>(<.0001) |                   |                     |
| FDK       | 0.496<br>(<.0001) | 0.439<br>(<.0001) | 0.039<br>(<.0001) | 0.458<br>(<.0001) | 0.44<br>(<.0001)  |                     |
| DON       | 0.697<br>(<.0001) | 0.233<br>(<.0001) | 0.307<br>(<.0001) | 0.319<br>(<.0001) | 0.241<br>(<.0001) | 0.53175<br>(<.0001) |

Values in parenthesis indicate significance of correlation coefficients.

Table S5. Pearson correlation coefficients between FHB rating and days to heading in AGS 2060 x AGS 2035 DH population from data collected in Newport 2018.

|                 | Index              | Days to heading   | FDK               |
|-----------------|--------------------|-------------------|-------------------|
| Days to heading | -0.288<br>(<.0001) |                   |                   |
| FDK             | 0.409<br>(<.0001)  | -0.155<br>0.028   |                   |
| DON             | 0.038<br>-0.0595   | 0.306<br>(<.0001) | 0.547<br>(<.0001) |

Values in parenthesis indicate significance of correlation coefficients.

Supplementary Table S6. Broad-sense heritability ( $H^2$ ) estimates for FDK and DON over environments

| Over environments |             |                          |         |          |          |         |          |              |
|-------------------|-------------|--------------------------|---------|----------|----------|---------|----------|--------------|
| Trait             | Environment | Source                   | DF      | SS       | MS       | F-value | Pr>F     |              |
| FDK               | BR          | Model                    | 198     | 52376.43 | 264.5274 | 7.9188  | 0.00E+00 |              |
| FDK               | BR          | Error                    | 197     | 6580.821 | 33.4052  |         |          |              |
| FDK               | BR          | Total                    | 395     | 58957.25 |          |         |          |              |
| FDK               | BR          | R-square(%)              | 88.838  |          |          |         |          |              |
| Trait             | Environment | Source                   | DF      | SS       | MS       | F-value | Pr>F     | EstimatedVar |
| FDK               | BR          | Block                    | 1       | 3.5511   | 3.5511   | 0.1063  | 7.45E-01 | 0            |
| FDK               | BR          | Genotype                 | 197     | 52372.88 | 265.8522 | 7.9584  | 0.00E+00 | 116.2235     |
| FDK               | BR          | LSD(0.05)                | 11.3981 |          |          |         |          |              |
| FDK               | BR          | LSD(0.01)                | 15.0332 |          |          |         |          |              |
| FDK               | BR          | H <sup>2</sup> _per_plot | 0.7767  |          |          |         |          |              |
| FDK               | BR          | H <sup>2</sup> _per_mean | 0.8743  |          |          |         |          |              |
|                   |             |                          |         |          |          |         |          |              |
| Trait             | Environment | Source                   | DF      | SS       | MS       | F-value | Pr>F     |              |
| FDK               | WN          | Model                    | 198     | 44569.36 | 225.0978 | 7.4312  | 0.00E+00 |              |
| FDK               | WN          | Error                    | 197     | 5967.315 | 30.2909  |         |          |              |
| FDK               | WN          | Total                    | 395     | 50536.68 |          |         |          |              |
| FDK               | WN          | R-square(%)              | 88.1921 |          |          |         |          |              |
| Trait             | Environment | Source                   | DF      | SS       | MS       | F-value | Pr>F     | EstimatedVar |
| FDK               | WN          | Block                    | 1       | 4.5613   | 4.5613   | 0.1506  | 6.98E-01 | 0            |
| FDK               | WN          | Genotype                 | 197     | 44564.8  | 226.2172 | 7.4681  | 0.00E+00 | 97.9632      |
| FDK               | WN          | LSD(0.05)                | 10.8538 |          |          |         |          |              |
| FDK               | WN          | LSD(0.01)                | 14.3153 |          |          |         |          |              |
| FDK               | WN          | H <sup>2</sup> _per_plot | 0.7638  |          |          |         |          |              |
| FDK               | WN          | H <sup>2</sup> _per_mean | 0.8661  |          |          |         |          |              |
|                   |             |                          |         |          |          |         |          |              |
| Trait             | Environment | Source                   | DF      | SS       | MS       | F-value | Pr>F     |              |
| DON               | BR          | Model                    | 198     | 8880.531 | 44.8512  | 4.7593  | 0.00E+00 |              |
| DON               | BR          | Error                    | 197     | 1856.493 | 9.4238   |         |          |              |
| DON               | BR          | Total                    | 395     | 10737.02 |          |         |          |              |
| DON               | BR          | R-square(%)              | 82.7094 |          |          |         |          |              |
| Trait             | Environment | Source                   | DF      | SS       | MS       | F-value | Pr>F     | EstimatedVar |
| DON               | BR          | Block                    | 1       | 500.3218 | 500.3218 | 53.0912 | 0.00E+00 | 2.4793       |
| DON               | BR          | Genotype                 | 197     | 8380.209 | 42.5391  | 4.514   | 0.00E+00 | 16.5577      |
| DON               | BR          | LSD(0.05)                | 6.0539  |          |          |         |          |              |
| DON               | BR          | LSD(0.01)                | 7.9847  |          |          |         |          |              |
| DON               | BR          | H <sup>2</sup> _per_plot | 0.6373  |          |          |         |          |              |
| DON               | BR          | H <sup>2</sup> _per_mean | 0.7785  |          |          |         |          |              |

| Trait | Environment | Source                   | DF      | SS       | MS       | F-value | Pr>F     |              |
|-------|-------------|--------------------------|---------|----------|----------|---------|----------|--------------|
| DON   | WN          | Model                    | 198     | 19965.33 | 100.835  | 5.4181  | 0.00E+00 |              |
| DON   | WN          | Error                    | 197     | 3666.336 | 18.6108  |         |          |              |
| DON   | WN          | Total                    | 395     | 23631.66 |          |         |          |              |
| DON   | WN          | R-square(%)              | 84.4855 |          |          |         |          |              |
| Trait | Environment | Source                   | DF      | SS       | MS       | F-value | Pr>F     | EstimatedVar |
| DON   | WN          | Block                    | 1       | 142.6376 | 142.6376 | 7.6642  | 6.17E-03 | 0.6264       |
| DON   | WN          | Genotype                 | 197     | 19822.69 | 100.6228 | 5.4067  | 0.00E+00 | 41.006       |
| DON   | WN          | LSD(0.05)                | 8.5076  |          |          |         |          |              |
| DON   | WN          | LSD(0.01)                | 11.2209 |          |          |         |          |              |
| DON   | WN          | H <sup>2</sup> _per_plot | 0.6878  |          |          |         |          |              |
| DON   | WN          | H <sup>2</sup> _per_mean | 0.815   |          |          |         |          |              |

| Trait | Environment | Source                   | DF      | SS       | MS       | F-value  | Pr>F     |              |
|-------|-------------|--------------------------|---------|----------|----------|----------|----------|--------------|
| FDK   | Combined    | Model                    | 397     | 131548.5 | 331.3565 | 10.4043  | 0.00E+00 |              |
| FDK   | Combined    | Error                    | 394     | 12548.17 | 31.8481  |          |          |              |
| FDK   | Combined    | Total                    | 791     | 144096.7 |          |          |          |              |
| FDK   | Combined    | R-square(%)              | 91.2918 |          |          |          |          |              |
| Trait | Environment | Source                   | DF      | SS       | MS       | F-value  | Pr>F     | EstimatedVar |
| FDK   | Combined    | Block/Env                | 2       | 8.1125   | 4.0562   | 0.1274   | 8.80E-01 | 0            |
| FDK   | Combined    | Genotype                 | 197     | 78918.59 | 400.602  | 12.5785  | 0.00E+00 | 92.1885      |
| FDK   | Combined    | Environment              | 1       | 34602.49 | 34602.49 | 1086.484 | 0.00E+00 | 87.2996      |
| FDK   | Combined    | GE_interaction           | 197     | 18019.34 | 91.4687  | 2.872    | 0.00E+00 | 29.8103      |
| FDK   | Combined    | LSD(0.05)                | 13.2955 |          |          |          |          |              |
| FDK   | Combined    | LSD(0.01)                | 17.5044 |          |          |          |          |              |
| FDK   | Combined    | H <sup>2</sup> _per_plot | 0.5992  |          |          |          |          |              |
| FDK   | Combined    | H <sup>2</sup> _per_mean | 0.8013  |          |          |          |          |              |
| FDK   | Homogeneity | BartlettTest             | 0.4702  | 4.93E-01 |          |          |          |              |

| Trait | Environment | Source                   | DF      | SS       | MS       | F-value | Pr>F     |              |
|-------|-------------|--------------------------|---------|----------|----------|---------|----------|--------------|
| DON   | Combined    | Model                    | 397     | 29226.56 | 73.6185  | 5.252   | 0.00E+00 |              |
| DON   | Combined    | Error                    | 394     | 5522.826 | 14.0173  |         |          |              |
| DON   | Combined    | Total                    | 791     | 34749.39 |          |         |          |              |
| DON   | Combined    | R-square(%)              | 84.1067 |          |          |         |          |              |
| Trait | Environment | Source                   | DF      | SS       | MS       | F-value | Pr>F     | EstimatedVar |
| DON   | Combined    | Block/Env                | 2       | 642.9496 | 321.4748 | 22.9341 | 0.00E+00 | 1.5528       |
| DON   | Combined    | Genotype                 | 197     | 16685.99 | 84.7005  | 6.0426  | 0.00E+00 | 17.6708      |
| DON   | Combined    | Environment              | 1       | 380.7129 | 380.7129 | 27.1602 | 0.00E+00 | 0.926        |
| DON   | Combined    | GE_interaction           | 197     | 11516.91 | 58.4615  | 4.1707  | 0.00E+00 | 22.2221      |
| DON   | Combined    | LSD(0.05)                | 10.6293 |          |          |         |          |              |
| DON   | Combined    | LSD(0.01)                | 13.9941 |          |          |         |          |              |
| DON   | Combined    | H <sup>2</sup> _per_plot | 0.3278  |          |          |         |          |              |
| DON   | Combined    | H <sup>2</sup> _per_mean | 0.5473  |          |          |         |          |              |

DON Homogeneity BartlettTest 22.3233 3.34E-06

**Over years**

| Trait | Environment | Source       | DF  | SS       | MS       | F-value | Pr>F     | EstimatedVar |
|-------|-------------|--------------|-----|----------|----------|---------|----------|--------------|
| FDK   | 17          | Model        | 198 | 55028.3  | 277.9207 | 2.9626  | 9.72E-06 |              |
| FDK   | 17          | Error        | 193 | 18105.12 | 93.8089  |         |          |              |
| FDK   | 17          | Total        | 391 | 73133.42 |          |         |          |              |
| FDK   | 17          | R-square(%)  |     | 75.2437  |          |         |          |              |
| FDK   | 17          | Source       | DF  | SS       | MS       | F-value | Pr>F     | EstimatedVar |
| FDK   | 17          | Block        | 1   | 13.3354  | 13.3354  | 0.1422  | 7.07E-01 | 0            |
| FDK   | 17          | Genotype     | 197 | 55014.97 | 279.2638 | 2.9769  | 5.72E-06 | 93.6736      |
| FDK   | 17          | LSD(0.05)    |     | 19.2002  |          |         |          |              |
| FDK   | 17          | LSD(0.01)    |     | 25.3255  |          |         |          |              |
| FDK   | 17          | H^2_per_plot |     | 0.4996   |          |         |          |              |
| FDK   | 17          | H^2_per_mean |     | 0.6641   |          |         |          |              |

| Trait | Environment | Source       | DF  | SS       | MS       | F-value | Pr>F     | EstimatedVar |
|-------|-------------|--------------|-----|----------|----------|---------|----------|--------------|
| FDK   | 18          | Model        | 198 | 60498.01 | 305.5455 | 12.7941 | 0.00E+00 |              |
| FDK   | 18          | Error        | 197 | 4704.689 | 23.8817  |         |          |              |
| FDK   | 18          | Total        | 395 | 65202.7  |          |         |          |              |
| FDK   | 18          | R-square(%)  |     | 92.7845  |          |         |          |              |
| FDK   | 18          | Source       | DF  | SS       | MS       | F-value | Pr>F     | EstimatedVar |
| FDK   | 18          | Block        | 1   | 17.1875  | 17.1875  | 0.7197  | 3.97E-01 | 0            |
| FDK   | 18          | Genotype     | 197 | 60480.82 | 307.0092 | 12.8554 | 0.00E+00 | 141.5638     |
| FDK   | 18          | LSD(0.05)    |     | 9.6373   |          |         |          |              |
| FDK   | 18          | LSD(0.01)    |     | 12.7109  |          |         |          |              |
| FDK   | 18          | H^2_per_plot |     | 0.8557   |          |         |          |              |
| FDK   | 18          | H^2_per_mean |     | 0.9222   |          |         |          |              |

| Trait | Environment | Source       | DF  | SS       | MS       | F-value | Pr>F     | EstimatedVar |
|-------|-------------|--------------|-----|----------|----------|---------|----------|--------------|
| DON   | 17          | Model        | 198 | 9560.827 | 48.287   | 2.8686  | 1.04E-05 |              |
| DON   | 17          | Error        | 193 | 3248.8   | 16.8332  |         |          |              |
| DON   | 17          | Total        | 391 | 12809.63 |          |         |          |              |
| DON   | 17          | R-square(%)  |     | 74.6378  |          |         |          |              |
| DON   | 17          | Source       | DF  | SS       | MS       | F-value | Pr>F     | EstimatedVar |
| DON   | 17          | Block        | 1   | 572.3271 | 572.3271 | 34      | 2.62E-06 | 2.8342       |
| DON   | 17          | Genotype     | 197 | 8988.5   | 45.6269  | 2.7105  | 8.70E-06 | 14.5438      |
| DON   | 17          | LSD(0.05)    |     | 8.1333   |          |         |          |              |
| DON   | 17          | LSD(0.01)    |     | 10.728   |          |         |          |              |
| DON   | 17          | H^2_per_plot |     | 0.4635   |          |         |          |              |
| DON   | 17          | H^2_per_mean |     | 0.6311   |          |         |          |              |

| Trait | Environment | Source | DF  | SS      | MS     | F-value | Pr>F     | EstimatedVar |
|-------|-------------|--------|-----|---------|--------|---------|----------|--------------|
| DON   | 18          | Model  | 198 | 10919.3 | 55.148 | 5.9108  | 0.00E+00 |              |

|     |    |              |         |          |          |         |          |              |
|-----|----|--------------|---------|----------|----------|---------|----------|--------------|
| DON | 18 | Error        | 197     | 1838.026 | 9.3301   |         |          |              |
| DON | 18 | Total        | 395     | 12757.33 |          |         |          |              |
| DON | 18 | R-square(%)  | 85.5924 |          |          |         |          |              |
| DON | 18 | Source       | DF      | SS       | MS       | F-value | Pr>F     | EstimatedVar |
| DON | 18 | Block        | 1       | 137.6238 | 137.6238 | 14.7505 | 1.68E-04 | 0.6479       |
| DON | 18 | Genotype     | 197     | 10781.67 | 54.7293  | 5.8659  | 0.00E+00 | 22.6996      |
| DON | 18 | LSD(0.05)    | 6.0238  |          |          |         |          |              |
| DON | 18 | LSD(0.01)    | 7.9449  |          |          |         |          |              |
| DON | 18 | H^2_per_plot | 0.7087  |          |          |         |          |              |
| DON | 18 | H^2_per_mean | 0.8295  |          |          |         |          |              |

|       |             |                |         |          |          |          |          |              |
|-------|-------------|----------------|---------|----------|----------|----------|----------|--------------|
| Trait | Environment | Source         | DF      | SS       | MS       | F-value  | Pr>F     |              |
| FDK   | Combined    | Model          | 397     | 121733.5 | 306.6336 | 5.2428   | 0.00E+00 |              |
| FDK   | Combined    | Error          | 390     | 22809.88 | 58.4869  |          |          |              |
| FDK   | Combined    | Total          | 787     | 144543.4 |          |          |          |              |
| FDK   | Combined    | R-square(%)    | 84.2194 |          |          |          |          |              |
| FDK   | Combined    | Source         | DF      | SS       | MS       | F-value  | Pr>F     | EstimatedVar |
| FDK   | Combined    | Block/Env      | 2       | 30.4679  | 15.234   | 0.2605   | 7.71E-01 | 0            |
| FDK   | Combined    | Genotype       | 197     | 91859.15 | 466.2901 | 7.9726   | 0.00E+00 | 102.4683     |
| FDK   | Combined    | Environment    | 1       | 6196.534 | 6196.534 | 105.9474 | 0.00E+00 | 15.5788      |
| FDK   | Combined    | GE_interaction | 197     | 23647.38 | 120.0375 | 2.0524   | 0.00E+00 | 30.9315      |
| FDK   | Combined    | LSD(0.05)      | 15.2899 |          |          |          |          |              |
| FDK   | Combined    | LSD(0.01)      | 20.1305 |          |          |          |          |              |
| FDK   | Combined    | H^2_per_plot   | 0.534   |          |          |          |          |              |
| FDK   | Combined    | H^2_per_mean   | 0.7726  |          |          |          |          |              |
| FDK   | Homogeneity | BartlettTest   | 85.0476 | 0.00E+00 |          |          |          |              |

|       |             |                |         |          |          |         |          |              |
|-------|-------------|----------------|---------|----------|----------|---------|----------|--------------|
| Trait | Environment | Source         | DF      | SS       | MS       | F-value | Pr>F     |              |
| DON   | Combined    | Model          | 397     | 20769.42 | 52.3159  | 4.011   | 0.00E+00 |              |
| DON   | Combined    | Error          | 390     | 5086.828 | 13.0431  |         |          |              |
| DON   | Combined    | Total          | 787     | 25856.25 |          |         |          |              |
| DON   | Combined    | R-square(%)    | 80.3265 |          |          |         |          |              |
| DON   | Combined    | Source         | DF      | SS       | MS       | F-value | Pr>F     | EstimatedVar |
| DON   | Combined    | Block/Env      | 2       | 710.1093 | 355.0546 | 27.2215 | 1.61E-06 | 1.7361       |
| DON   | Combined    | Genotype       | 197     | 15238.57 | 77.3531  | 5.9306  | 0.00E+00 | 16.1591      |
| DON   | Combined    | Environment    | 1       | 288.8243 | 288.8243 | 22.1438 | 4.89E-06 | 0.7          |
| DON   | Combined    | GE_interaction | 197     | 4531.924 | 23.0047  | 1.7637  | 1.19E-06 | 5.0061       |
| DON   | Combined    | LSD(0.05)      | 6.6922  |          |          |         |          |              |
| DON   | Combined    | LSD(0.01)      | 8.8108  |          |          |         |          |              |
| DON   | Combined    | H^2_per_plot   | 0.4724  |          |          |         |          |              |
| DON   | Combined    | H^2_per_mean   | 0.7365  |          |          |         |          |              |
| DON   | Homogeneity | BartlettTest   | 16.7238 | 4.49E-05 |          |         |          |              |

Table S7. Linkage map of the DH population developed by the SNP markers

| Chromosome | Marker #      | Coverage (cM)  | Avg.<br>distance/marker |
|------------|---------------|----------------|-------------------------|
| 1A         | 109           | 141.17         | 1.30                    |
| 1B         | 147           | 160.11         | 1.09                    |
| 1D         | 54            | 153.66         | 2.85                    |
| 2A         | 116           | 225.33         | 1.94                    |
| 2B         | 367           | 168.42         | 0.46                    |
| 2D         | 69            | 166.12         | 2.41                    |
| 3A         | 91            | 175.57         | 1.93                    |
| 3B         | 126           | 179.83         | 1.43                    |
| 3D         | 6             | 77.92          | 12.99                   |
| 4A         | 64            | 132.48         | 2.07                    |
| 4B         | 96            | 170.36         | 1.77                    |
| 4D         | 17            | 85.14          | 5.01                    |
| 5A         | 92            | 254.71         | 2.77                    |
| 5B         | 161           | 215.28         | 1.34                    |
| 5D         | 14            | 129.79         | 9.27                    |
| 6A         | 114           | 310.73         | 2.73                    |
| 6B         | 112           | 172.39         | 1.54                    |
| 6D         | 26            | 212.03         | 8.16                    |
| 7A         | 103           | 230.94         | 2.24                    |
| 7B         | 108           | 177.15         | 1.64                    |
| 7D         | 18            | 207.67         | 11.54                   |
|            | Total = 2,011 | Total = 3746.8 | Average = 1.86          |

Table S8. Average DON and FDK of the DH lines derived from AGS 2035 x AGS 2060

|                | Trait |      |
|----------------|-------|------|
|                | FDK   | DON  |
| AGS2035-1      | 44.4  | 11.8 |
| AGS2060-1      | 24.4  | 9.5  |
| LA12016DHA-1   | 58.1  | 23.9 |
| LA12016DHA-10  | 46.7  | 20.2 |
| LA12016DHA-100 | 37.8  | 11.6 |
| LA12016DHA-101 | 31.1  | 8.2  |
| LA12016DHA-102 | 49.4  | 17.8 |
| LA12016DHA-104 | 30.6  | 9.3  |
| LA12016DHA-106 | 33.9  | 10.2 |
| LA12016DHA-107 | 30.0  | 8.6  |
| LA12016DHA-108 | 32.2  | 9.7  |
| LA12016DHA-11  | 24.4  | 6.5  |
| LA12016DHA-12  | 33.9  | 5.4  |
| LA12016DHA-13  | 41.1  | 12.6 |
| LA12016DHA-14  | 57.2  | 13.3 |
| LA12016DHA-15  | 26.1  | 25.2 |
| LA12016DHA-16  | 52.8  | 15.4 |
| LA12016DHA-17  | 35.0  | 9.0  |
| LA12016DHA-18  | 30.6  | 9.6  |
| LA12016DHA-19  | 54.4  | 18.9 |
| LA12016DHA-2   | 34.4  | 10.7 |
| LA12016DHA-20  | 37.2  | 13.1 |
| LA12016DHA-21  | 30.6  | 6.7  |
| LA12016DHA-22  | 45.0  | 13.8 |
| LA12016DHA-23  | 37.2  | 8.3  |
| LA12016DHA-24  | 48.9  | 13.6 |
| LA12016DHA-25  | 31.1  | 7.9  |
| LA12016DHA-26  | 45.6  | 21.0 |
| LA12016DHA-27  | 51.1  | 16.3 |
| LA12016DHA-28  | 27.8  | 8.6  |
| LA12016DHA-29  | 26.1  | 7.7  |
| LA12016DHA-3   | 52.8  | 16.4 |
| LA12016DHA-30  | 42.8  | 11.0 |
| LA12016DHA-31  | 34.4  | 10.5 |
| LA12016DHA-32  | 35.6  | 9.6  |
| LA12016DHA-33  | 39.4  | 13.6 |
| LA12016DHA-34  | 40.0  | 19.1 |
| LA12016DHA-35  | 43.9  | 10.9 |
| LA12016DHA-36  | 21.7  | 7.4  |
| LA12016DHA-37  | 38.9  | 23.7 |
| LA12016DHA-38  | 22.2  | 9.1  |
| LA12016DHA-39  | 20.6  | 16.1 |
| LA12016DHA-4   | 23.9  | 9.7  |



|               |      |      |
|---------------|------|------|
| LA12016DHA-40 | 18.3 | 11.5 |
| LA12016DHA-41 | 27.2 | 6.5  |
| LA12016DHA-42 | 32.8 | 15.5 |
| LA12016DHA-43 | 16.7 | 9.6  |
| LA12016DHA-44 | 50.6 | 17.5 |
| LA12016DHA-45 | 45.6 | 14.0 |
| LA12016DHA-46 | 42.8 | 13.2 |
| LA12016DHA-47 | 41.1 | 22.2 |
| LA12016DHA-48 | 27.2 | 6.2  |
| LA12016DHA-49 | 26.1 | 8.2  |
| LA12016DHA-5  | 56.1 | 19.4 |
| LA12016DHA-50 | 24.4 | 9.2  |
| LA12016DHA-51 | 47.8 | 18.0 |
| LA12016DHA-52 | 33.3 | 13.0 |
| LA12016DHA-53 | 31.1 | 8.8  |
| LA12016DHA-54 | 22.8 | 10.6 |
| LA12016DHA-55 | 46.7 | 19.9 |
| LA12016DHA-56 | 57.2 | 24.1 |
| LA12016DHA-57 | 17.8 | 6.6  |
| LA12016DHA-58 | 46.1 | 13.2 |
| LA12016DHA-59 | 32.8 | 12.2 |
| LA12016DHA-6  | 22.8 | 12.0 |
| LA12016DHA-60 | 28.9 | 8.4  |
| LA12016DHA-61 | 37.2 | 10.4 |
| LA12016DHA-62 | 47.8 | 16.1 |
| LA12016DHA-63 | 33.3 | 14.4 |
| LA12016DHA-64 | 31.1 | 9.9  |
| LA12016DHA-65 | 43.9 | 9.8  |
| LA12016DHA-66 | 32.2 | 10.9 |
| LA12016DHA-67 | 32.2 | 17.0 |
| LA12016DHA-68 | 35.0 | 11.5 |
| LA12016DHA-69 | 56.7 | 15.3 |
| LA12016DHA-7  | 18.3 | 6.7  |
| LA12016DHA-70 | 33.9 | 9.8  |
| LA12016DHA-71 | 46.1 | 18.1 |
| LA12016DHA-72 | 36.7 | 11.4 |
| LA12016DHA-73 | 38.3 | 11.5 |
| LA12016DHA-74 | 23.9 | 11.0 |
| LA12016DHA-75 | 17.8 | 7.7  |
| LA12016DHA-76 | 27.8 | 10.4 |
| LA12016DHA-77 | 28.3 | 21.4 |
| LA12016DHA-78 | 38.9 | 21.6 |
| LA12016DHA-79 | 20.6 | 4.5  |
| LA12016DHA-8  | 38.9 | 11.7 |
| LA12016DHA-80 | 43.9 | 13.3 |
| LA12016DHA-81 | 43.3 | 11.6 |

|               |      |      |
|---------------|------|------|
| LA12016DHA-82 | 43.9 | 11.3 |
| LA12016DHA-83 | 26.7 | 13.9 |
| LA12016DHA-84 | 50.0 | 16.0 |
| LA12016DHA-85 | 46.7 | 14.4 |
| LA12016DHA-86 | 30.6 | 15.0 |
| LA12016DHA-87 | 56.1 | 14.4 |
| LA12016DHA-88 | 57.8 | 28.0 |
| LA12016DHA-89 | 45.6 | 17.3 |
| LA12016DHA-9  | 29.4 | 8.2  |
| LA12016DHA-90 | 25.6 | 15.0 |
| LA12016DHA-91 | 35.0 | 12.4 |
| LA12016DHA-92 | 25.6 | 10.1 |
| LA12016DHA-93 | 34.4 | 17.1 |
| LA12016DHA-94 | 52.2 | 16.8 |
| LA12016DHA-95 | 26.7 | 8.0  |
| LA12016DHA-96 | 40.6 | 14.2 |
| LA12016DHA-97 | 45.0 | 13.5 |
| LA12016DHA-99 | 33.9 | 12.8 |
| LA12016DHB-1  | 45.6 | 17.6 |
| LA12016DHB-10 | 31.1 | 7.2  |
| LA12016DHB-11 | 30.0 | 6.2  |
| LA12016DHB-12 | 40.6 | 15.9 |
| LA12016DHB-13 | 60.6 | 27.3 |
| LA12016DHB-14 | 29.4 | 19.4 |
| LA12016DHB-15 | 23.3 | 20.5 |
| LA12016DHB-16 | 23.9 | 5.0  |
| LA12016DHB-17 | 43.8 | 17.2 |
| LA12016DHB-19 | 28.3 | 11.7 |
| LA12016DHB-2  | 41.1 | 11.9 |
| LA12016DHB-20 | 52.8 | 26.7 |
| LA12016DHB-21 | 38.9 | 10.7 |
| LA12016DHB-22 | 50.0 | 22.7 |
| LA12016DHB-23 | 38.9 | 6.7  |
| LA12016DHB-24 | 43.9 | 13.5 |
| LA12016DHB-25 | 41.1 | 13.0 |
| LA12016DHB-26 | 41.7 | 12.7 |
| LA12016DHB-27 | 43.9 | 17.0 |
| LA12016DHB-28 | 56.7 | 18.5 |
| LA12016DHB-29 | 20.0 | 4.9  |
| LA12016DHB-3  | 31.1 | 11.0 |
| LA12016DHB-30 | 21.7 | 4.7  |
| LA12016DHB-31 | 41.1 | 11.6 |
| LA12016DHB-32 | 52.2 | 20.9 |
| LA12016DHB-33 | 36.7 | 11.8 |
| LA12016DHB-34 | 43.9 | 16.5 |
| LA12016DHB-35 | 31.1 | 10.7 |

|               |      |      |
|---------------|------|------|
| LA12016DHB-36 | 25.6 | 7.7  |
| LA12016DHB-37 | 40.6 | 20.0 |
| LA12016DHB-38 | 45.0 | 13.3 |
| LA12016DHB-39 | 56.7 | 17.6 |
| LA12016DHB-4  | 36.7 | 18.9 |
| LA12016DHB-40 | 31.3 | 16.8 |
| LA12016DHB-41 | 34.4 | 9.1  |
| LA12016DHB-42 | 26.1 | 9.1  |
| LA12016DHB-43 | 33.3 | 12.0 |
| LA12016DHB-44 | 48.8 | 10.2 |
| LA12016DHB-45 | 57.8 | 19.1 |
| LA12016DHB-46 | 27.8 | 12.6 |
| LA12016DHB-47 | 44.4 | 19.1 |
| LA12016DHB-48 | 36.1 | 13.0 |
| LA12016DHB-49 | 46.1 | 12.2 |
| LA12016DHB-5  | 38.3 | 28.6 |
| LA12016DHB-50 | 44.4 | 17.9 |
| LA12016DHB-51 | 26.1 | 6.7  |
| LA12016DHB-52 | 54.4 | 15.7 |
| LA12016DHB-53 | 33.9 | 12.5 |
| LA12016DHB-54 | 43.3 | 8.0  |
| LA12016DHB-55 | 52.8 | 17.9 |
| LA12016DHB-56 | 38.3 | 10.3 |
| LA12016DHB-57 | 32.2 | 10.4 |
| LA12016DHB-58 | 38.9 | 15.9 |
| LA12016DHB-59 | 21.7 | 5.2  |
| LA12016DHB-6  | 28.3 | 7.3  |
| LA12016DHB-60 | 35.0 | 16.5 |
| LA12016DHB-62 | 50.0 | 10.1 |
| LA12016DHB-63 | 39.4 | 12.8 |
| LA12016DHB-64 | 50.0 | 12.7 |
| LA12016DHB-65 | 39.4 | 14.2 |
| LA12016DHB-66 | 42.2 | 13.2 |
| LA12016DHB-67 | 44.4 | 19.1 |
| LA12016DHB-68 | 37.8 | 9.4  |
| LA12016DHB-69 | 52.2 | 14.4 |
| LA12016DHB-7  | 39.4 | 16.5 |
| LA12016DHB-70 | 31.1 | 9.5  |
| LA12016DHB-71 | 35.6 | 9.7  |
| LA12016DHB-72 | 42.2 | 17.7 |
| LA12016DHB-73 | 56.1 | 13.9 |
| LA12016DHB-74 | 32.2 | 10.1 |
| LA12016DHB-75 | 46.1 | 15.8 |
| LA12016DHB-76 | 33.3 | 11.6 |
| LA12016DHB-77 | 33.3 | 10.3 |
| LA12016DHB-78 | 32.2 | 10.3 |

|               |      |      |
|---------------|------|------|
| LA12016DHB-79 | 28.9 | 8.5  |
| LA12016DHB-8  | 32.8 | 23.8 |
| LA12016DHB-80 | 38.3 | 15.7 |
| LA12016DHB-81 | 40.6 | 12.8 |
| LA12016DHB-82 | 25.0 | 7.6  |
| LA12016DHB-83 | 29.4 | 10.1 |
| LA12016DHB-85 | 38.9 | 14.2 |
| LA12016DHB-86 | 29.4 | 10.2 |
| LA12016DHB-89 | 39.4 | 13.4 |
| LA12016DHB-9  | 27.8 | 11.1 |
| LA12016DHB-90 | 36.1 | 11.2 |
| LA12016DHB-91 | 29.4 | 6.2  |
| LA12016DHB-92 | 39.4 | 17.4 |

Table S9. Genes within 20 kb flanking the markers closest to the QTL peaks

| <b>Marker (closest to QTL)</b> | <b>Genes similar to</b>                                                                                                                                                                                                                                                                                                                                                                                                                                                                                                                                   |
|--------------------------------|-----------------------------------------------------------------------------------------------------------------------------------------------------------------------------------------------------------------------------------------------------------------------------------------------------------------------------------------------------------------------------------------------------------------------------------------------------------------------------------------------------------------------------------------------------------|
| BS00067792_51                  | <i>Triticum aestivum</i> gamma gliadin-A1, gamma gliadin-A3, gamma gliadin-A4, and LMW-A2 genes<br><i>Aegilops tauschii</i> subsp. <i>tauschii</i> folate-biopterin transporter 1, chloroplastic-like (LOC109754426), transcript variant X2<br><i>Triticum aestivum</i> RAR1 (RAR1) gene, RAR1-A1 allele<br><i>Aegilops tauschii</i> subsp. <i>tauschii</i> small RNA degrading nuclease 1-like (LOC109736362)                                                                                                                                            |
| BS00069019_51                  | miR1436-3p-117<br>miR1118-3p-37<br>miR1436-3p-31<br>miR1118-3p-59                                                                                                                                                                                                                                                                                                                                                                                                                                                                                         |
| Tdurum_contig11173_79          | <i>Aegilops tauschii</i> subsp. <i>tauschii</i> peptidyl-prolyl cis-trans isomerase NIMA-interacting 4 (LOC109773849)<br><i>Aegilops tauschii</i> subsp. <i>tauschii</i> fructose-bisphosphate aldolase-lysine N-methyltransferase, chloroplastic (LOC109773851)<br><i>Aegilops tauschii</i> subsp. <i>tauschii</i> pentatricopeptide repeat-containing protein At5g61400-like (LOC109773850)                                                                                                                                                             |
| BS00064162_51                  | <i>Aegilops tauschii</i> subsp. <i>tauschii</i> uncharacterized LOC109734195 (LOC109734195)<br><i>Aegilops tauschii</i> subsp. <i>tauschii</i> ATP-dependent DNA helicase PIF6-like (LOC109744440)<br><i>Aegilops tauschii</i> subsp. <i>tauschii</i> uncharacterized LOC109734195 (LOC109734195)                                                                                                                                                                                                                                                         |
| CAP11_c7700_247                | <i>Aegilops tauschii</i> subsp. <i>tauschii</i> E3 ubiquitin-protein ligase RNF170-like (LOC109774652)<br><i>Aegilops tauschii</i> subsp. <i>tauschii</i> uncharacterized LOC109774651 (LOC109774651), transcript variant X2<br><i>Aegilops tauschii</i> subsp. <i>tauschii</i> uncharacterized LOC109774655 (LOC109774655)<br><i>Thinopyrum elongatum</i> early salt stress and cold acclimation-induced protein 2-1 (Esi2) gene                                                                                                                         |
| BobWhite_c344_125              | <i>Aegilops tauschii</i> subsp. <i>tauschii</i> 7-deoxyloganetic acid glucosyltransferase-like (LOC109765156)<br><i>Triticum aestivum</i> omega gliadin-D1, omega gliadin-D2, omega gliadin-D3, gamma gliadin-D1, delta gliadin-D1, gamma gliadin-D2, gamma gliadin-D3, gamma gliadin-D4, LMW-D1, LMW-D2, LMW-D3, LMW-D6, and LMW-D7 genes<br><i>Aegilops tauschii</i> subsp. <i>tauschii</i> vegetative cell wall protein gp1-like (LOC109777230)<br><i>Aegilops tauschii</i> subsp. <i>tauschii</i> protein disulfide isomerase-like 1-4 (LOC109756626) |

w SNP\_CAP11\_c1137\_665073 *Triticum aestivum* geranylgeranyl hydrogenase mRNA  
IAAV822 WD repeat-containing protein 89 homolog [*Aegilops tauschii*  
subsp. *tauschii*]  
Tdurum\_contig42424\_291 LRR receptor-like serine/threonine-protein kinase HSL2  
[*Triticum urartu*]

Figure S1. Genetic map of wheat showing QTLs detected for DON and/or FDK. Marker intervals in cM are on the left of the chromosome while marker names are on the right. Colored lines indicate the trait evaluated for the QTL analysis.

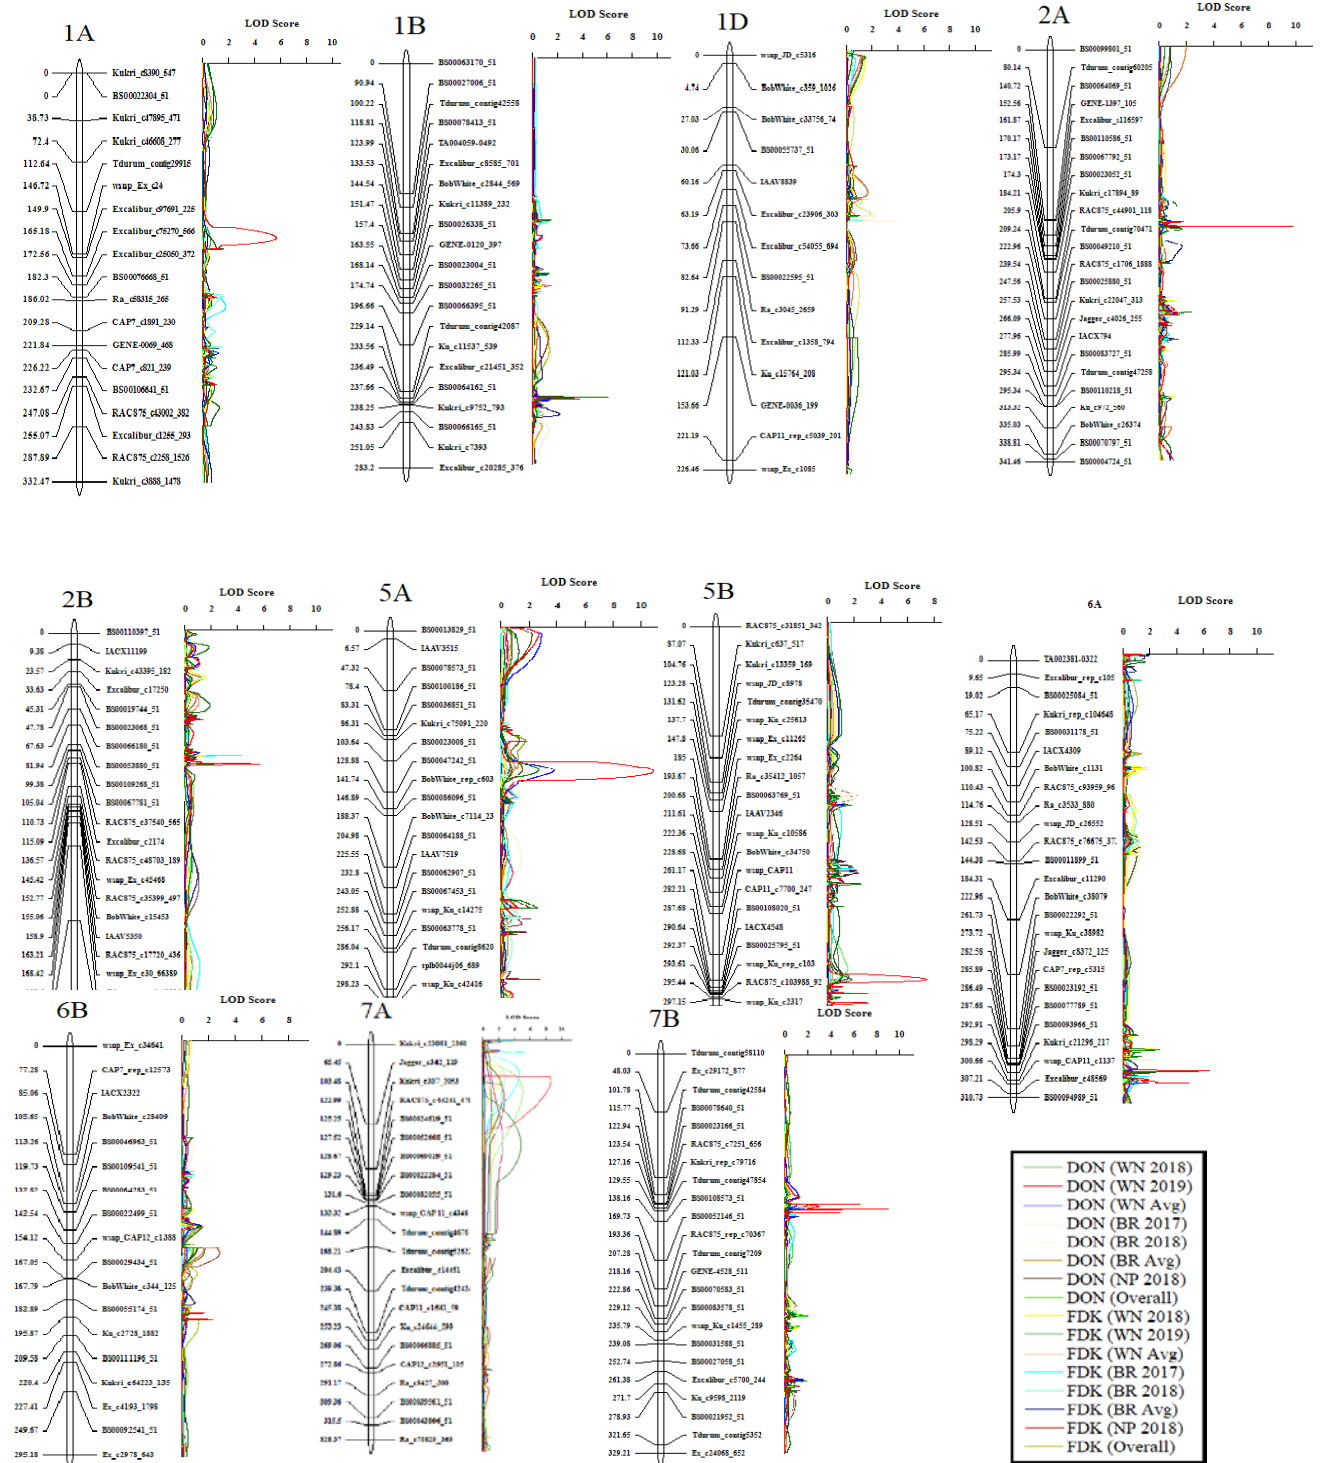

Supplement: genes-11-00699-s001.pdf [file genes-11-00699-s001.pdf]
